# Supplementary material for: Effects of Cow’s Milk Processing on MicroRNA Levels
Source: MDPI journal article supplement (doi:10.3390/foods12152950), 2023-08-04
Supplement: s1 [file s1]

# Supplementary Materials:

**Table S1.** Characteristics of the sampled farms.

| Dairy farm characteristic | Number of cows | Average milk production | Grazing | Grass silage              | Straw | Vetch | Alfalfa | Corn silage | Concentrate |
|---------------------------|----------------|-------------------------|---------|---------------------------|-------|-------|---------|-------------|-------------|
|                           |                | L/cow /day              | h/day   | kg fresh matter /cow/ day |       |       |         |             |             |
| 1                         | 41             | 21.00                   | Yes     | 5.00                      | 0.00  | 3.00  | 0.00    | 0.00        | 6.00        |
| 2                         | 38             | 23.00                   | Yes     | 0.00                      | 0.00  | 1.00  | 1.00    | 0.00        | 7.00        |
| 3                         | 35             | 15.00                   | Yes     | 0.00                      | 0.00  | 0.00  | 0.00    | 0.00        | 4.50        |
| 4                         | 61             | 25.00                   | Yes     | 5.00                      | 0.00  | 0.00  | 0.00    | 0.00        | 10.00       |
| 5                         | 14             | 25.00                   | Yes     | 5.00                      | 0.00  | 0.00  | 0.00    | 0.00        | 9.00        |
| 6                         | 240            | 36.00                   | No      | 10.00                     | 0.50  | 2.00  | 2.00    | 16.00       | 12.00       |
| 7                         | 60             | 32.00                   | No      | 20.00                     | 0.00  | 1.50  | 0.00    | 20.00       | 10.00       |
| 8                         | 75             | 34.00                   | No      | 8.00                      | 0.00  | 0.00  | 2.00    | 25.00       | 11.50       |
| 9                         | 50             | 30.00                   | No      | 6.00                      | 1.00  | 0.00  | 2.00    | 20.00       | 7.00        |
| 10                        | 44             | 34.00                   | No      | 10.00                     | 0.00  | 1.50  | 0.00    | 20.00       | 10.00       |

L/cow /day: liter per cow per day, h/day: hour per day, kg fresh matter /cow/ day: kilogram of fresh matter per cow per day

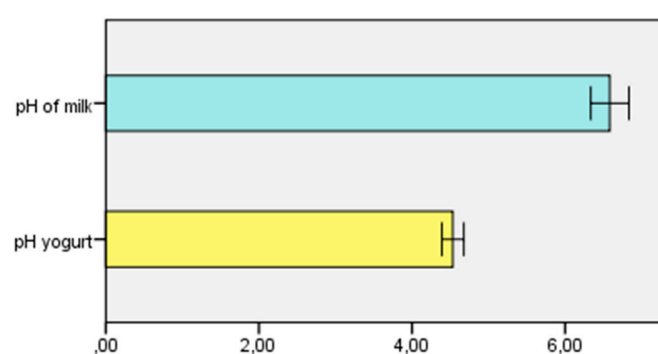

**Figure S1.** Mean pH and standard deviation for milk and yogurt.

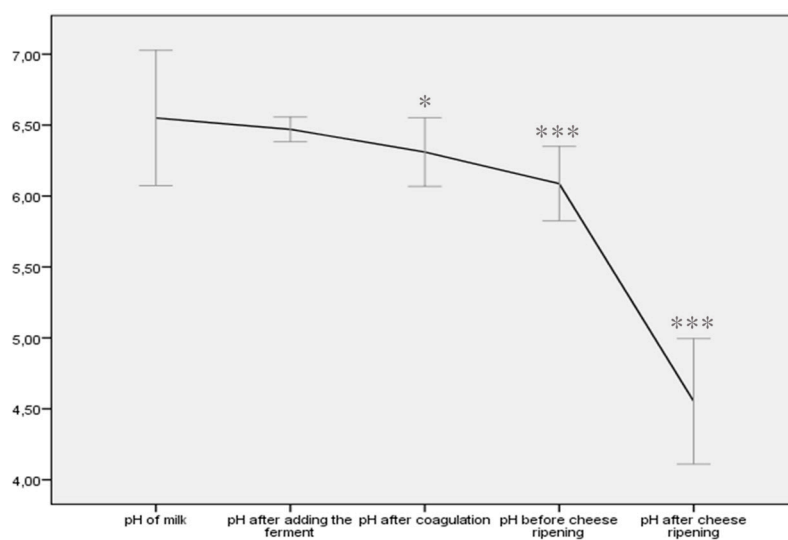

**Figure S2.** Evolution of pH in milk, during cheese manufacture and ripening. \* $P < 0.05$ , \*\* $P < 0.01$ , \*\*\* $P < 0.001$
